# Supplementary material
Source: HighWire-hosted journal article supplement (https://fg.bmj.com/content/9/1/16)
Supplement: inline-supplementary-material-1 [file inline-supplementary-material-1.pdf]

## Appendix C: Questionnaire

**Section 1: Questions in this section relate to emergency presentations of perianal sepsis in established or clinically suspected Crohn's disease. Please answer with what you would *most commonly* do.**

**If you review a patient and you believe they have a perianal abscess related to Crohn's, would you start antibiotics:**

- Always
- Usually
- Frequently
- Occasionally
- Never

**If yes, which antibiotic(s)?**

- Ciprofloxacin
- Metronidazole
- Augmentin
- Gentamicin
- Other (please specify)

**Section 2: Questions in this section relate to presentations of perianal fistulae in established or clinically suspected Crohn's disease. Please answer with what you would *most commonly* do. This assumes no fulminant sepsis requiring immediate drainage.**

**In your experience, how does a patient with perianal fistula related to Crohn's usually access treatment?**

- Via surgical clinic
- Via surgical on-call
- Via IBD nurse
- Via medical clinic
- Via medical on-call

|                                                                                                                                         |                                                                                                                                                 |                                                           |
|-----------------------------------------------------------------------------------------------------------------------------------------|-------------------------------------------------------------------------------------------------------------------------------------------------|-----------------------------------------------------------|
|                                                                                                                                         | Via other gastroenterology service<br><br>Via GP                                                                                                |                                                           |
| <b>If you saw a patient with a symptomatic fistula, would you refer directly to a surgeon or would you obtain imaging first?</b>        | Usually obtain imaging first<br><br>Usually refer direct to a surgeon                                                                           |                                                           |
| <b>If referring to a surgeon, do you refer to a named surgeon, or to the surgeon on-call?</b>                                           | Named surgeon<br><br>On-call surgeon                                                                                                            |                                                           |
| <b>If you undertake imaging, which modality do you use?</b>                                                                             | MRI pelvis/perineum<br><br>CT<br><br>Endoanal Ultrasound<br><br>Other (please specify)                                                          |                                                           |
| <b>What is the minimum set of investigations you would perform for a known Crohn's patient with a new perianal fistula?</b>             | Rigid sigmoidoscopy<br><br>Flexible sigmoidoscopy<br><br>Colonoscopy<br><br>Faecal Calprotectin<br><br>MRI Pelvis<br><br>Other (please specify) |                                                           |
| <b>If the diagnosis of Crohn's is not yet established, but is suspected, which of the following investigations would you undertake?</b> | Faecal calprotectin                                                                                                                             | Always<br><br>Frequently<br><br>Occasionally<br><br>Never |

|                                                                                                                                                                                |                                                             |                                                                                                                                                   |
|--------------------------------------------------------------------------------------------------------------------------------------------------------------------------------|-------------------------------------------------------------|---------------------------------------------------------------------------------------------------------------------------------------------------|
|                                                                                                                                                                                | Colonoscopy                                                 | <input type="checkbox"/> Always<br><input type="checkbox"/> Frequently<br><input type="checkbox"/> Occasionally<br><input type="checkbox"/> Never |
|                                                                                                                                                                                | Flexible sigmoidoscopy                                      | <input type="checkbox"/> Always<br><input type="checkbox"/> Frequently<br><input type="checkbox"/> Occasionally<br><input type="checkbox"/> Never |
|                                                                                                                                                                                | Video capsule endoscopy                                     | <input type="checkbox"/> Always<br><input type="checkbox"/> Frequently<br><input type="checkbox"/> Occasionally<br><input type="checkbox"/> Never |
|                                                                                                                                                                                | MRI Small Bowel                                             | <input type="checkbox"/> Always<br><input type="checkbox"/> Frequently<br><input type="checkbox"/> Occasionally<br><input type="checkbox"/> Never |
|                                                                                                                                                                                |                                                             | Other (please specify)                                                                                                                            |
| <b>Section 3: Questions in this section are related to the postoperative management after sepsis control or first EUA. Please answer with what you would most commonly do.</b> |                                                             |                                                                                                                                                   |
| Does your unit have an IBD Multi-disciplinary meeting?                                                                                                                         | <input type="checkbox"/> Yes<br><input type="checkbox"/> No |                                                                                                                                                   |

|                                                                                                            |                                                                                                                                                        |
|------------------------------------------------------------------------------------------------------------|--------------------------------------------------------------------------------------------------------------------------------------------------------|
| <b>Are patients with fistulating Crohn's disease discussed in your IBD MDT?</b>                            | Always<br>Usually<br>Sometimes<br>Never<br>N/A                                                                                                         |
| <b>In your practice, are immunosuppressant drugs used to treat fistula in ano associated with Crohn's?</b> | Almost always<br>Frequently<br>Occasionally<br>Never                                                                                                   |
| <b>In your practice, would you start with a single therapy or with multiple therapies?</b>                 | Single therapy<br>Antibiotics and thiopurine<br>Antibiotics and anti-TNF<br>Antibiotics, thiopurine and anti TNF<br>Other combination (please specify) |
| <b>If you use antibiotics in this setting, which do you tend to use?</b>                                   | Ciprofloxacin<br>Metronidazole<br>Augmentin<br>Gentamicin<br>Other (please specify)                                                                    |
| <b>How long do you use antibiotics for?</b>                                                                | 1 week<br>2 weeks<br>1 month<br>2 months                                                                                                               |

|                                                                                                                                  |                                                                                                                                                               |
|----------------------------------------------------------------------------------------------------------------------------------|---------------------------------------------------------------------------------------------------------------------------------------------------------------|
|                                                                                                                                  | >2 months                                                                                                                                                     |
| <b>Generally speaking, what drug is your first-line immunosuppressant in the management of fistulating perianal Crohn's</b>      | Steroid therapy<br>Aminosalicylates (sulfasalazine, mesalamine)<br>Azathioprine<br>Mercaptopurine<br>Methotrexate<br>Anti-TNF agent<br>Other (please specify) |
| <b>If you selected anti-TNF, which agent is your first choice for perianal Crohn's disease?</b>                                  | Infliximab<br>Adalimumab                                                                                                                                      |
| <b>Does the type of fistula (simple/complex) affect your treatment decision?</b>                                                 | Yes<br>No                                                                                                                                                     |
| <b>What interval between sepsis drainage and commencement of immunosuppressant/add-in anti-TNF therapy do you usually leave?</b> | 1-2 weeks<br>3-4 weeks<br>5-6 weeks<br>7-8 weeks<br>9 weeks +                                                                                                 |
| <b>Do you ask for evidence of sepsis resolution prior to immunosuppression?</b>                                                  | Almost always<br>Frequently<br>Occasionally                                                                                                                   |

|                                                                                                                                                                                                 |                                                                                                                                                         |
|-------------------------------------------------------------------------------------------------------------------------------------------------------------------------------------------------|---------------------------------------------------------------------------------------------------------------------------------------------------------|
|                                                                                                                                                                                                 | Never                                                                                                                                                   |
| <b>If so, what evidence do you take into account (tick all that apply)?</b>                                                                                                                     | <p>Surgeon's report from EUA</p> <p>Patient Symptoms</p> <p>Repeat imaging</p> <p>Overall disease activity</p>                                          |
| <b>When would you normally reassess symptoms after commencement of medical therapy?</b>                                                                                                         | <p>1 month</p> <p>3 months</p> <p>6 months</p> <p>Other: _____</p>                                                                                      |
| <b>In the context of fistula that is not responding to therapy based on clinical assessment, for how long do you typically continue first-line immunosuppression before escalating therapy?</b> | <p>up to 3 months</p> <p>up to 6 months</p> <p>up to 12 months</p> <p>up to 24 months</p> <p>as per clinical symptoms</p> <p>other (please specify)</p> |
| <b>After a period of first-line immunosuppression with improvement in symptoms, do you typically stop therapy, continue therapy or 'step-down'?</b>                                             | <p>Stop therapy</p> <p>Continue therapy</p> <p>Step down therapy</p>                                                                                    |
| <b>If you answered 'step down' therapy, please indicate what drug(s) you would</b>                                                                                                              | <p>Steroid therapy</p> <p>Aminosalicylates (sulfasalazine,</p>                                                                                          |

|                                                                                                                          |                                                                                                                                                                                                            |
|--------------------------------------------------------------------------------------------------------------------------|------------------------------------------------------------------------------------------------------------------------------------------------------------------------------------------------------------|
| <b>typically move to.</b>                                                                                                | <p>mesalamine)</p> <p>Azathioprine</p> <p>Mercaptopurine</p> <p>Methotrexate</p> <p>Infliximab</p> <p>Adalimumab</p> <p>Other (please specify)</p>                                                         |
| <b>After a period of first-line immunosuppression without improvement in symptoms, what would you typically do next?</b> | <p>Change medical therapy</p> <p>Re-image</p> <p>Obtain further surgical opinion</p>                                                                                                                       |
| <b>If you would change medical therapy, what would you change it to?</b>                                                 | <p>Steroid therapy</p> <p>Aminosalicylates (sulfasalazine, mesalamine)</p> <p>Azathioprine</p> <p>Mercaptopurine</p> <p>Methotrexate</p> <p>Infliximab</p> <p>Adalimumab</p> <p>Other (please specify)</p> |
| <b>In a stable or improving patient, how would you monitor response?</b>                                                 | <p>Repeat imaging</p> <p>Clinical response</p>                                                                                                                                                             |
|                                                                                                                          |                                                                                                                                                                                                            |

|                                                                                                                               |                                                                                                                                                                        |
|-------------------------------------------------------------------------------------------------------------------------------|------------------------------------------------------------------------------------------------------------------------------------------------------------------------|
| <b>Do you use any strategies to optimise medical therapy (tick those which apply):</b>                                        | <p>Assessment of thiopurine levels and optimisation of dose</p> <p>Assessment of anti-TNF levels and optimisation of dose</p> <p>Assessment of anti-TNF antibodies</p> |
| <b>What factors would make you consider referral to a surgeon for repeat EUA?</b>                                             | <p>Length of time on anti-TNF or immunomodulators</p> <p>Loss of response to drugs</p> <p>Quality of life</p> <p>Other (please specify)</p>                            |
| <b>If proctitis is present, does this typically alter your management?</b>                                                    | <p>Yes</p> <p>No</p>                                                                                                                                                   |
| <b>What aspects of your care does it affect?</b>                                                                              | <p>Surveillance – radiological/endoscopic</p> <p>Duration of immunosuppressant therapy</p> <p>Use of PR medications</p> <p>Choice of immunosuppressant therapy</p>     |
| <b>Section 4: Definitive management aimed at fistula healing/control</b>                                                      |                                                                                                                                                                        |
| <b>If your first line choice of immunosuppressant fails to resolve symptoms, what are your second and third line choices?</b> | <p>Second line:</p> <p>Third line:</p>                                                                                                                                 |
| <b>In what situations would you seek an opinion on formation of a defunctioning</b>                                           |                                                                                                                                                                        |



|                                                                         |  |
|-------------------------------------------------------------------------|--|
| <b>stoma?</b>                                                           |  |
| <b>In what situations would you seek an<br/>opinion on proctectomy?</b> |  |
